# Supplementary material
Source: Springer Nature journal article supplement (https://www.springermedizin.de/resource/supplementary/12939_2012_307_MOESM3_ESM.pdf/9550750)

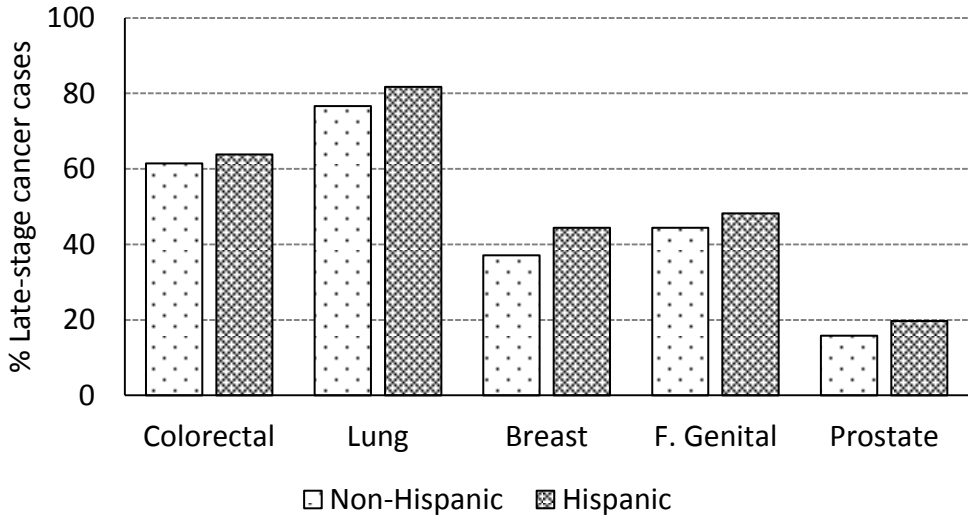

Supplement: MOESM3 [file 9550750]
